# Supplementary material for: Metabolite profiling of Bruguiera cylindrica reveals presence of potential bioactive compounds
Source: PeerJ journal article supplement (doi:10.7717/peerj-achem.16), 2022-05-04
Supplement: Supplementary_file_Raw_data.xlsx [file Supplementary_file_Raw_data.xlsx]

## Sheet: Positive ion mode 
Checked	Rt (min.)	Name	Molecular formula	Calculated mass	Error (ppm)	Annot. Source: Predicted Compositions	mzCloud search	Chemspider search	Area (Max)	mzCloud Best Match	MS2
TRUE	1.015	Tropine	C8 H15 N O	141.115	-1.45	Full match	Full match	Full match	4.93101e+08	98.2	DDA for preferred ion
TRUE	6.499	4-Hydroxybenzaldehyde	C7 H6 O2	122.037	-1.47	Full match	Full match	Full match	2.74542e+07	96	DDA for preferred ion
TRUE	7.546	Esculetin	C9 H6 O4	178.026	-1.35	Full match	Full match	Full match	2.68294e+07	88.9	DDA for preferred ion
TRUE	9.654	Syringic acid	C9 H10 O5	198.053	-1.6	Full match	Full match	Full match	1.44557e+07	75.8	DDA for preferred ion
TRUE	10.015	4-Coumaric acid	C9 H8 O3	164.047	-1.08	Full match	Full match	Full match	1.83023e+07	84.7	DDA for preferred ion
TRUE	10.17	Dioctyl phthalate	C24 H38 O4	390.276	-1.91	Full match	Full match	Full match	3.96964e+06	90.7	DDA for preferred ion
TRUE	11.159	Isoorientin	C21 H20 O11	448.1	-1.88	Full match	Full match	Full match	3.09187e+08	98.2	DDA for preferred ion
TRUE	11.437	Orientin	C21 H20 O11	448.1	-1.88	Full match	Full match	Full match	1.14704e+08	93.5	DDA for preferred ion
TRUE	12.921	Azelaic acid	C9 H16 O4	188.105	0.8	Full match	Full match	Full match	1.1341e+07	95.1	DDA for preferred ion
TRUE	14.774	Luteolin	C15 H10 O6	286.047	-1.89	Full match	Full match	Full match	1.40972e+08	98.5	DDA for preferred ion
TRUE	15.194	Kaempferol	C15 H10 O6	286.047	-1.89	Full match	Full match	Full match	1.28733e+07	90.6	DDA for preferred ion
TRUE	15.628	Apigenin	C15 H10 O5	270.052	-2.07	Full match	Full match	Full match	1.27424e+08	96.5	DDA for preferred ion
TRUE	20.336	12-oxo Phytodienoic Acid	C18 H28 O3	292.203	-2.07	Full match	Full match	Full match	2.72964e+09	77.5	DDA for preferred ion
TRUE	20.38	Caryophyllene oxide	C15 H24 O	220.182	-1.13	Full match	Full match	Full match	4.238e+07	80.6	DDA for preferred ion
TRUE	20.51	Monobutyl phthalate	C12 H14 O4	222.089	-2.06	Full match	Full match	Full match	6.71871e+06	63.6	DDA for preferred ion
TRUE	20.772	9-Oxo-10(E),12(E)-octadecadienoic acid	C18 H30 O3	294.219	-1.75	Full match	Full match	Full match	1.47768e+10	96.5	DDA for preferred ion
TRUE	21.709	Ursolic acid	C30 H48 O3	456.361	0.98	Full match	Full match	Full match	1.63066e+07	98.1	DDA for preferred ion
TRUE	22.316	Betulin	C30 H50 O2	442.381	-0.81	Full match	Full match	Full match	4.73117e+08	85.6	DDA for preferred ion
TRUE	22.732	Linoleic acid	C18 H32 O2	280.241	1.04	Full match	Full match	Full match	1.77604e+07	94.6	DDA for preferred ion
TRUE	22.747	Hexadecanamide	C16 H33 N O	255.256	-1.56	Full match	Full match	Full match	4.38387e+08	99	DDA for preferred ion
TRUE	22.956	9-Octadecenamide	C18 H35 N O	281.271	-1.4	Full match	Full match	Full match	4.12148e+07	75.6	DDA for preferred ion
TRUE	23.048	Palmitic acid	C16 H32 O2	256.24	1.02	Full match	Full match	Full match	2.13937e+07	96.5	DDA for preferred ion
TRUE	23.229	Oleic acid	C18 H34 O2	282.256	0.84	Full match	Full match	Full match	9.8451e+06	94.9	DDA for preferred ion
TRUE	23.743	Stearic acid	C18 H36 O2	284.272	0.74	Full match	Full match	Full match	1.22388e+07	95.9	DDA for preferred ion
TRUE	24.969	Docosanamide	C22 H45 N O	339.349	-1.89	Full match	Full match	Full match	1.86641e+07	81.8	DDA for preferred ion
